# Supplementary material for: ‘Give me something meaningful’: GPs perspectives on how to improve an audit and feedback report provided by health insurers – an exploratory qualitative study
Source: PubMed Central journal article supplement — BMJ Open Qual. 2022 Nov 14;11(4):e002006. doi: 10.1136/bmjoq-2022-002006 (PMC9664288; doi:10.1136/bmjoq-2022-002006), 2022-11-14

### 3. Patient population

#### 3.1 Number of patients registered in practice

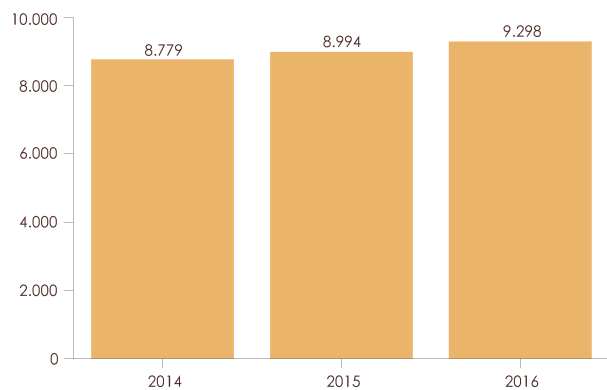

#### 3.2 Percentage of registered patients by income level based on zip-code (2016)

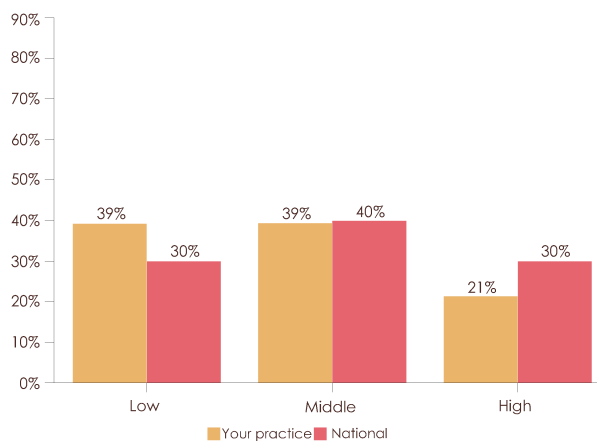

#### 3.3 Percentage of registered patients by age and gender (2016)

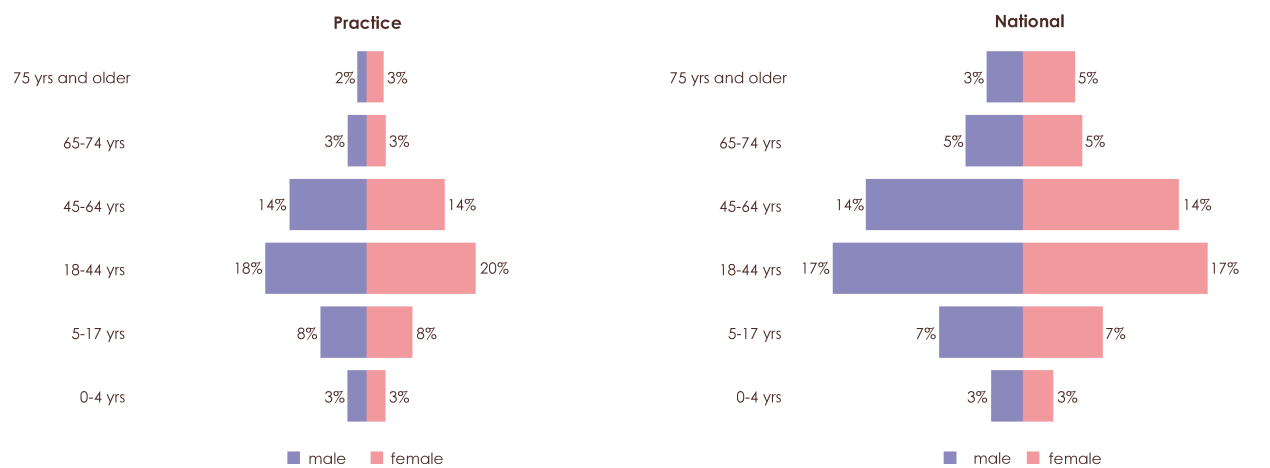

| Number of patients | 0-4 yrs | 5-17 yrs | 18-44 yrs | 45-64 yrs | 65-74 yrs | 75 yrs and older |
|--------------------|---------|----------|-----------|-----------|-----------|------------------|
| male               | 317     | 763      | 1.684     | 1.280     | 311       | 152              |
| female             | 312     | 763      | 1.814     | 1.299     | 316       | 284              |

| Distribution by gender | % Gender practice | % Gender national |
|------------------------|-------------------|-------------------|
| male                   | 48%               | 50%               |
| female                 | 52%               | 50%               |

\* Source: "CBS: Key figures zipcode areas 2008-2010". See appendix for more information.

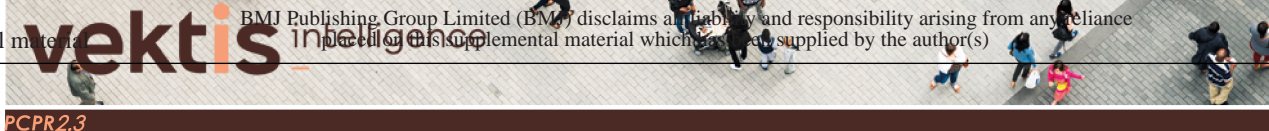

PCPR2.3

Reference date: 01-07-2016

### 5.3 Breakdown of registered patients by type of healthcare user (2016)

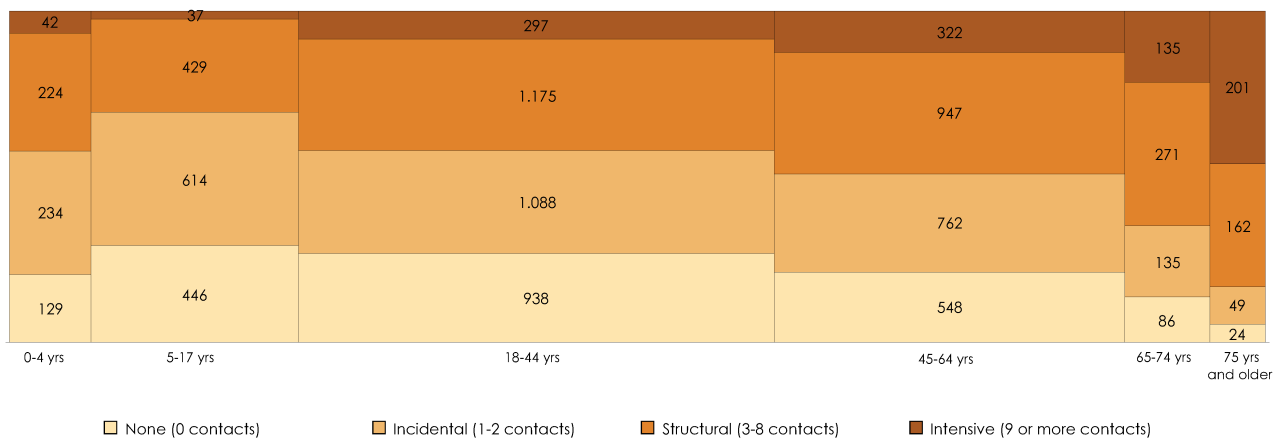

**5.4 Average number of consultations and visits per registered patient (2016)**

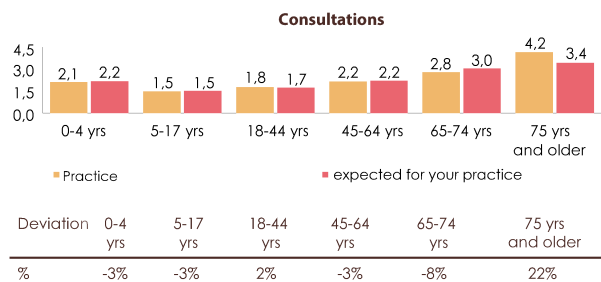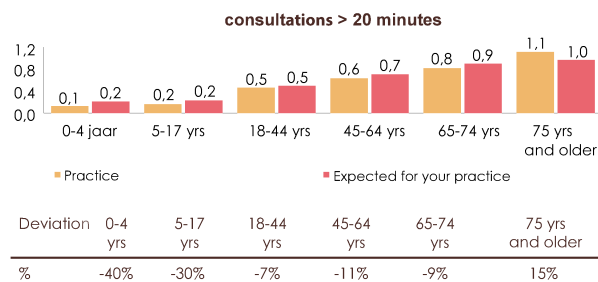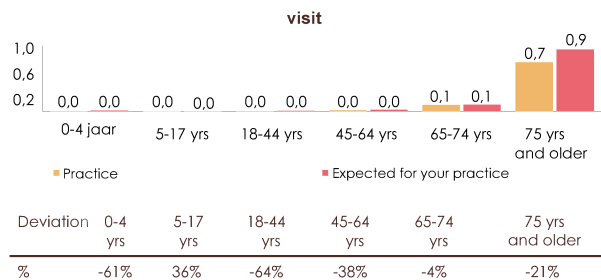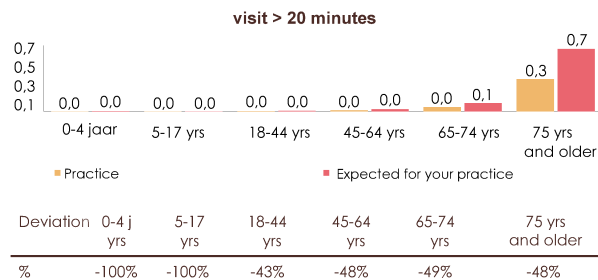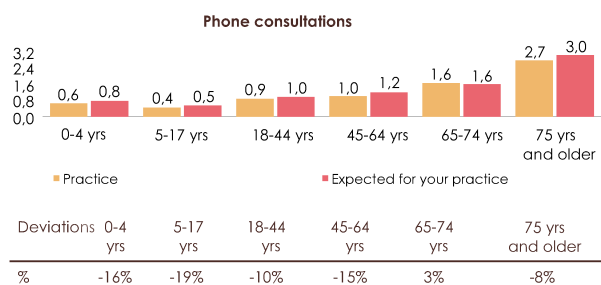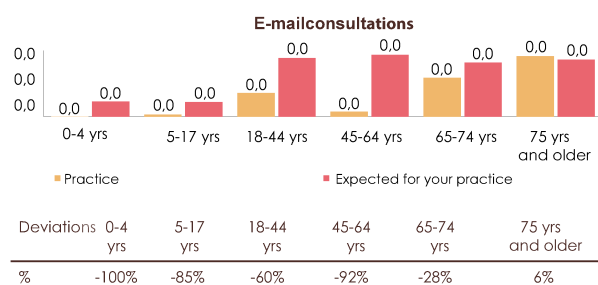

### 5.5 Overview percentage deviation number of claimed M&I interventions in your practice vs. expected (2016)

For the 10 nationally most common claimed interventions

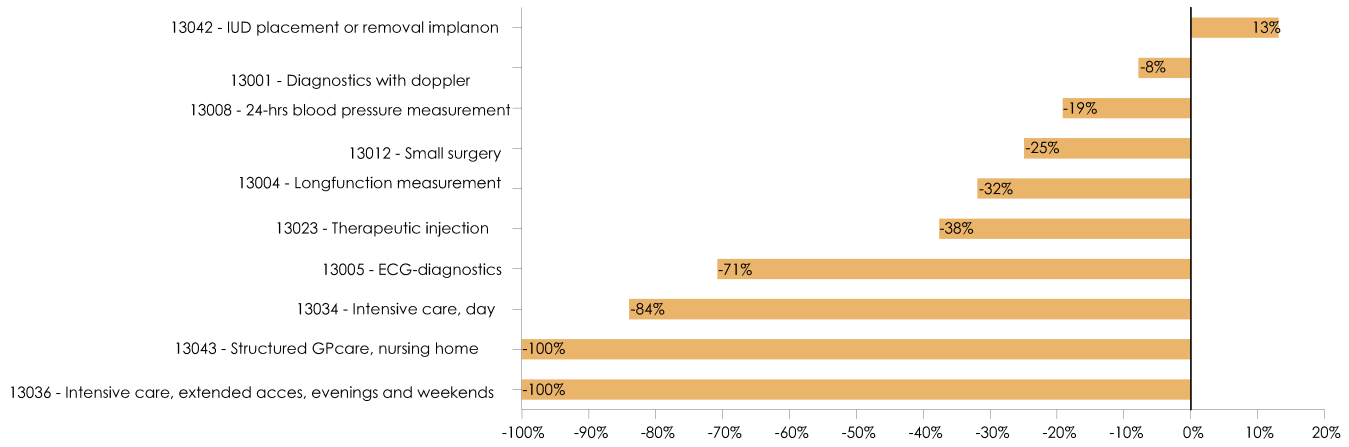

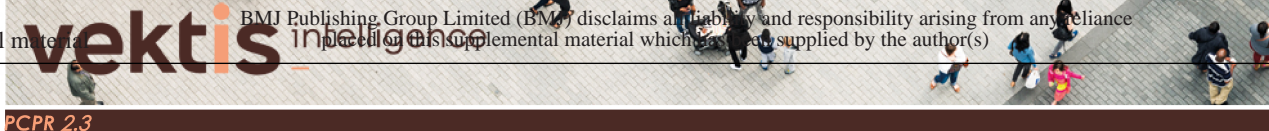

## 11. Primary care diagnostics

### 11.1 Average costs primary care diagnostics per registered patient

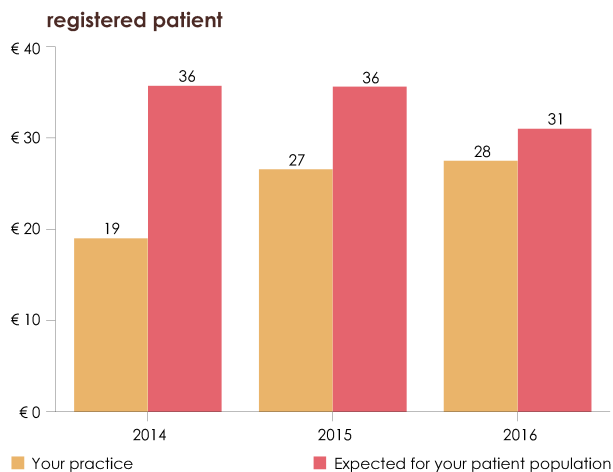

| Deviation | 2014 | 2015 | 2016 |
|-----------|------|------|------|
| %         | -47% | -25% | -11% |

### 11.2 Overview primary care diagnostics (2016)

|               | % Care using patients | Per Care using patient | Per registered patient |
|---------------|-----------------------|------------------------|------------------------|
| Your practice | 36%                   | € 77                   | € 28                   |
| Expected      | 37%                   | € 85                   | € 31                   |
| % deviation   | -2%                   | -9%                    | -11%                   |

## 12. Primary care diagnostics division of requests

### 12.1 Number of requests primary care diagnostics per registered patient

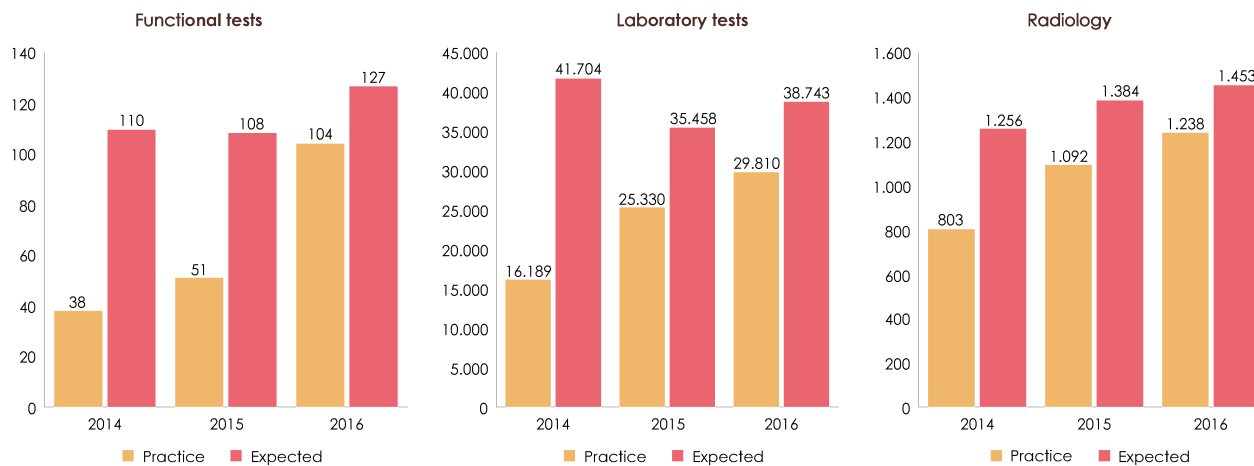

### 12.2 Percentage requests primary care diagnostics per type of provider

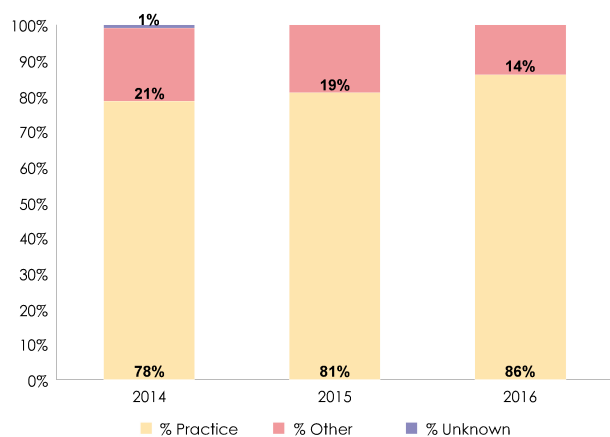

### 12.3 Percentage requests primary care diagnostics per GP in your practice

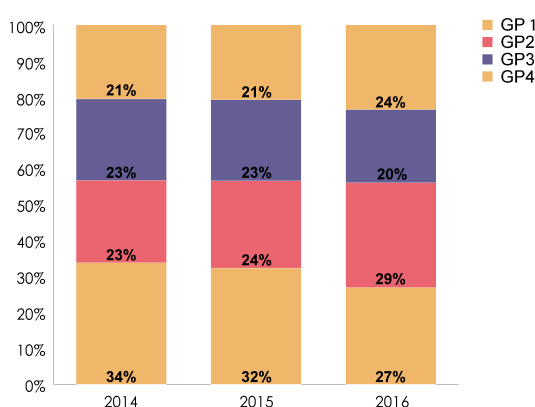

Supplement: bmjoq-2022-002006supp003.pdf [file bmjoq-2022-002006supp003.pdf]
