# Supplementary material for: ‘Give me something meaningful’: GPs perspectives on how to improve an audit and feedback report provided by health insurers – an exploratory qualitative study
Source: PubMed Central journal article supplement — BMJ Open Qual. 2022 Nov 14;11(4):e002006. doi: 10.1136/bmjoq-2022-002006 (PMC9664288; doi:10.1136/bmjoq-2022-002006), 2022-11-14
Supplement: bmjoq-2022-002006supp002.pdf [file bmjoq-2022-002006supp002.pdf]

## Supplemental File B – Interview Topic Guide

### 1. Descriptive Information

- Information used to gain insight in clinical practice
- Feedback used to gain insight in quality of care

### 2. ‘Thinking aloud’ method

- What do you see and do you understand what you see?
- What are your thoughts on what you see?
- How does what you see influence you and/or your practice?

### 3. Semi-structured interview

- Opinion on PCPR
- Recommendations to improve the usability of the PCPR
