# Supplementary figures and images for: ‘Give me something meaningful’: GPs perspectives on how to improve an audit and feedback report provided by health insurers – an exploratory qualitative study
Source: PubMed Central journal article supplement — BMJ Open Qual. 2022 Nov 14;11(4):e002006. doi: 10.1136/bmjoq-2022-002006 (PMC9664288; doi:10.1136/bmjoq-2022-002006), 2022-11-14

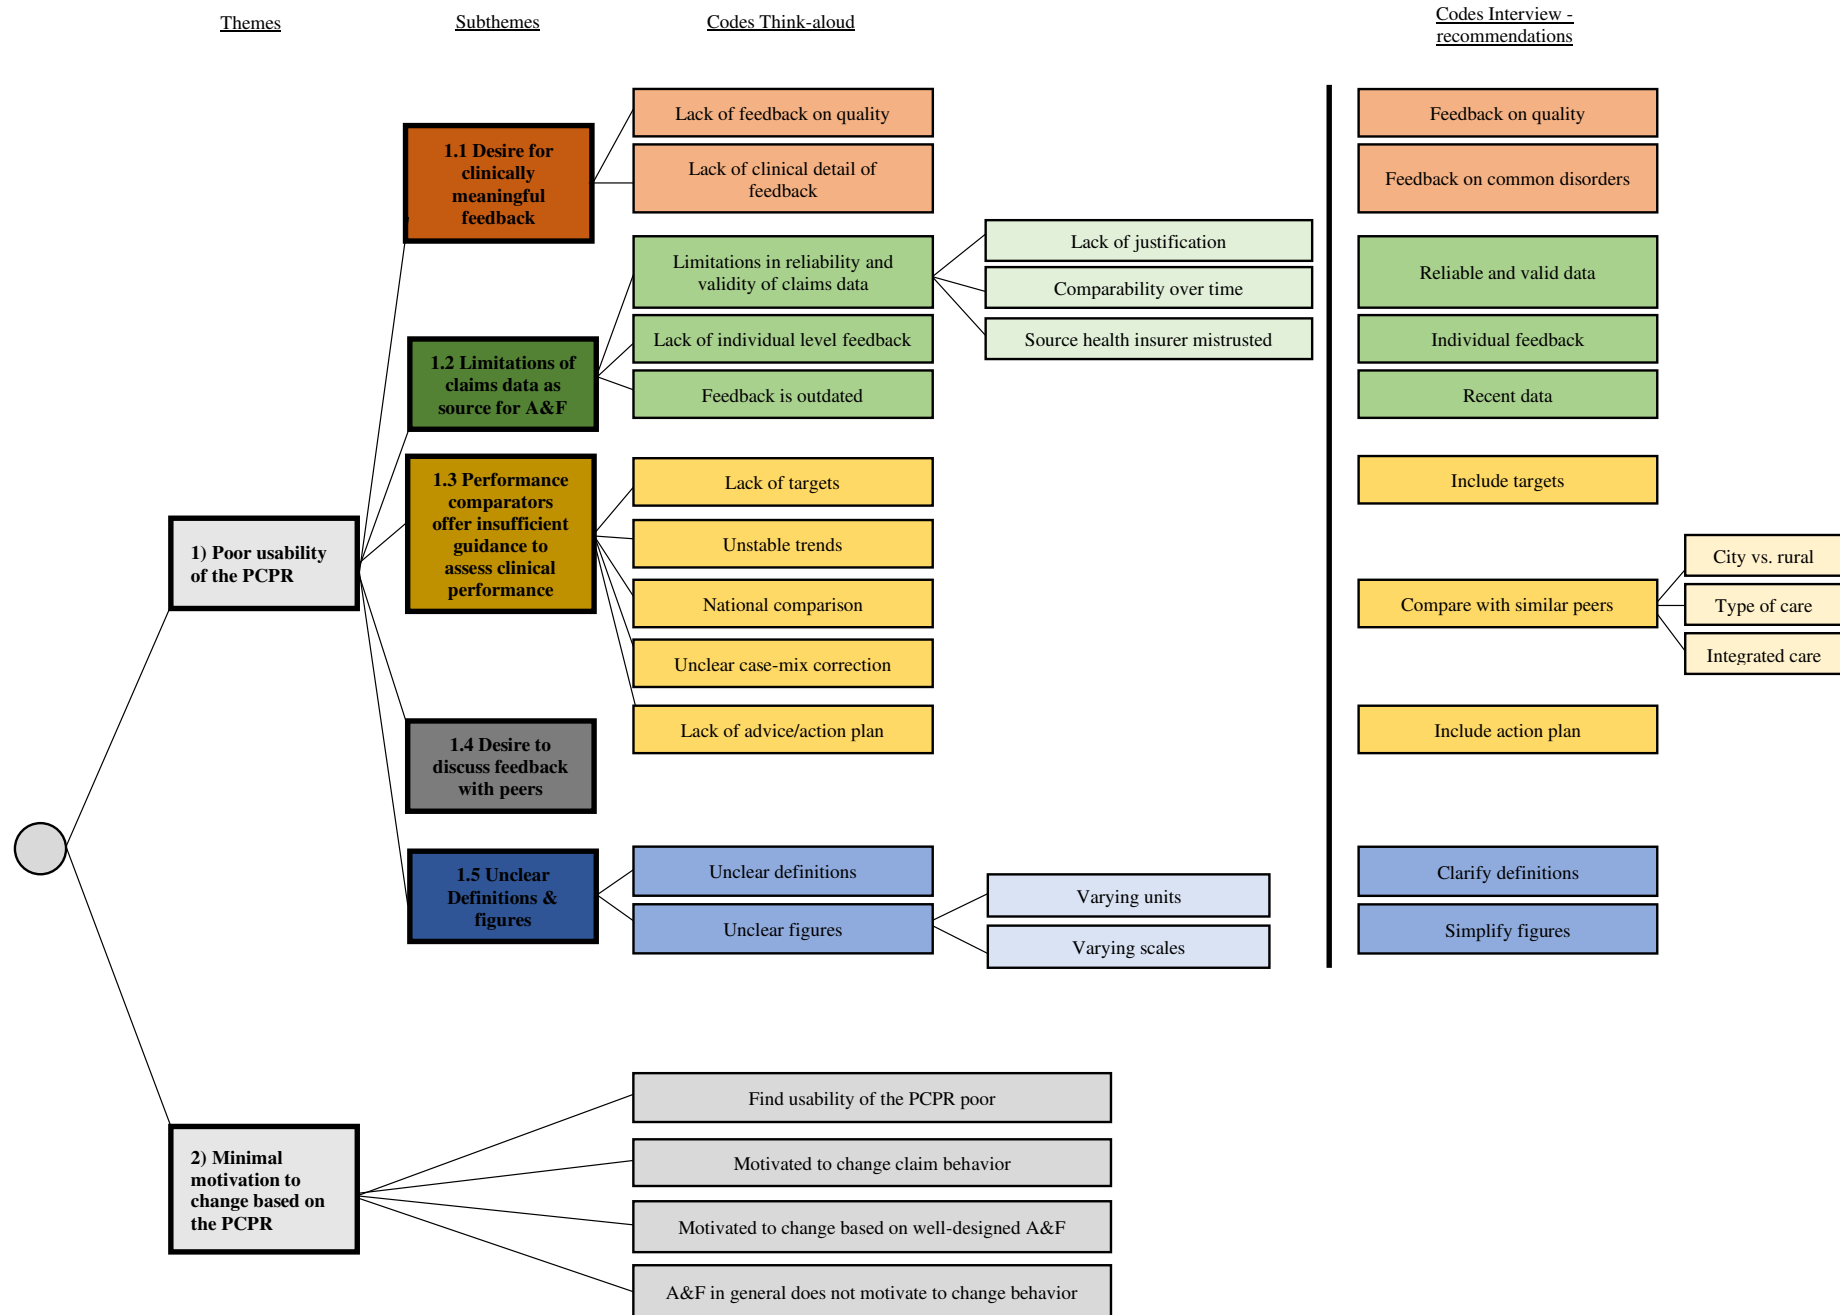

Supplement: bmjoq-2022-002006supp004.pdf [file bmjoq-2022-002006supp004.pdf]
